# Supplementary material
Source: PubMed Central journal article supplement (PMC11613269)
Supplement: NIHMS1924860-supplement-1.pdf [file NIHMS1924860-supplement-1.pdf]

A

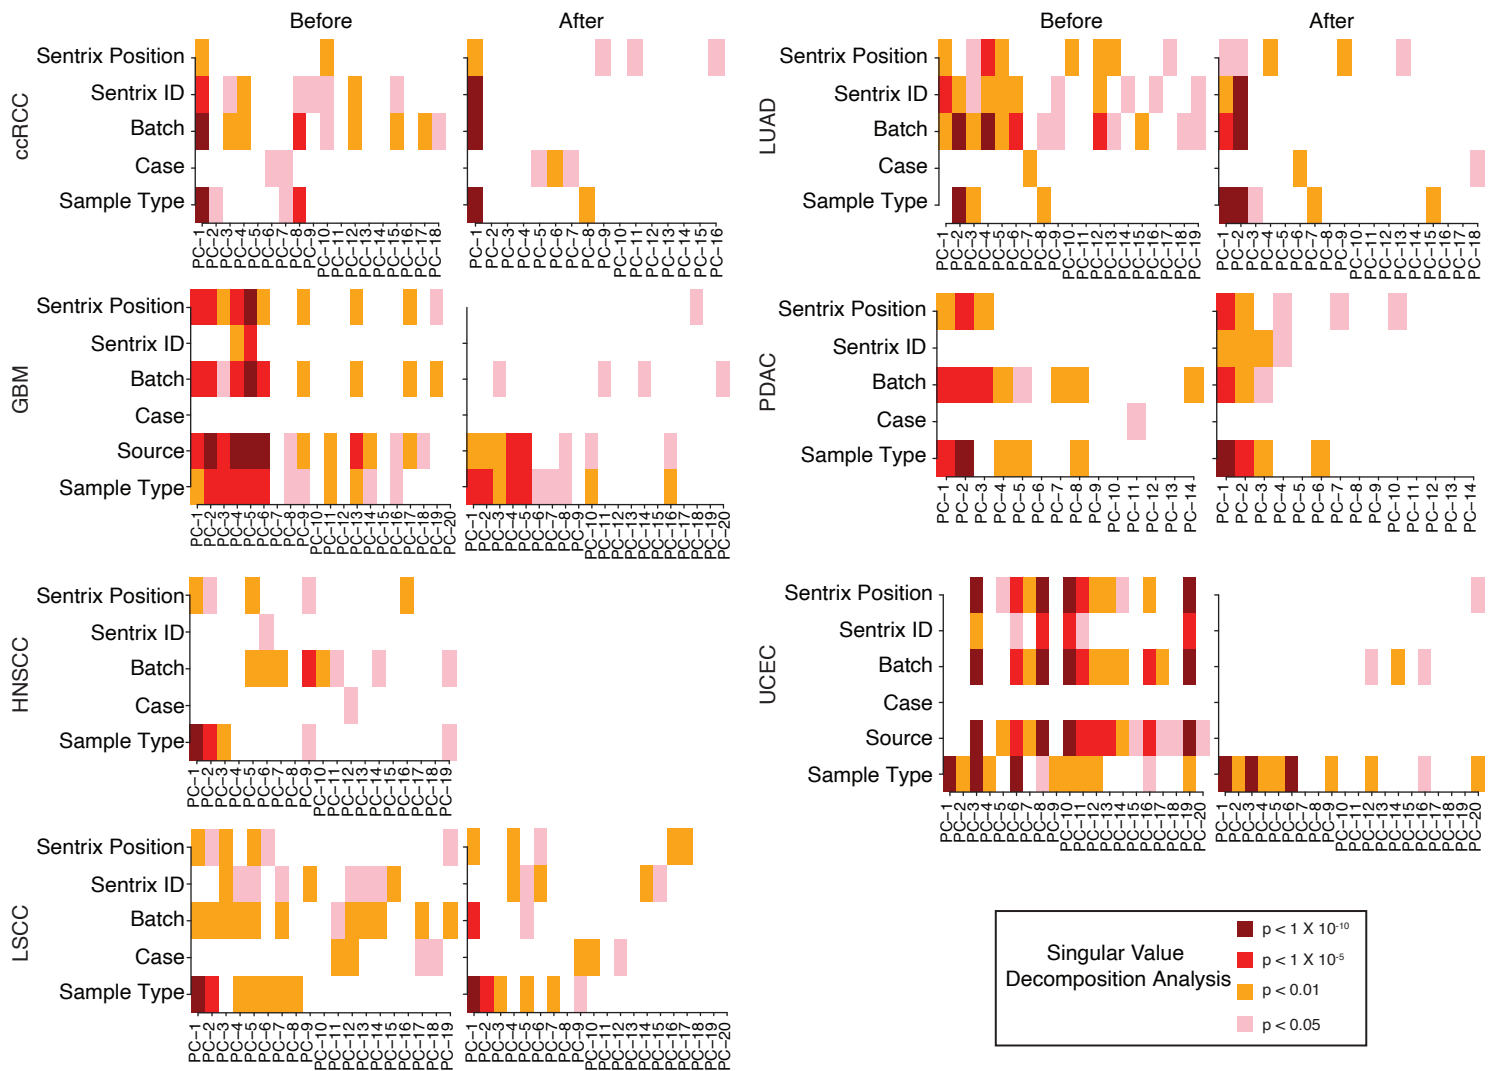

B

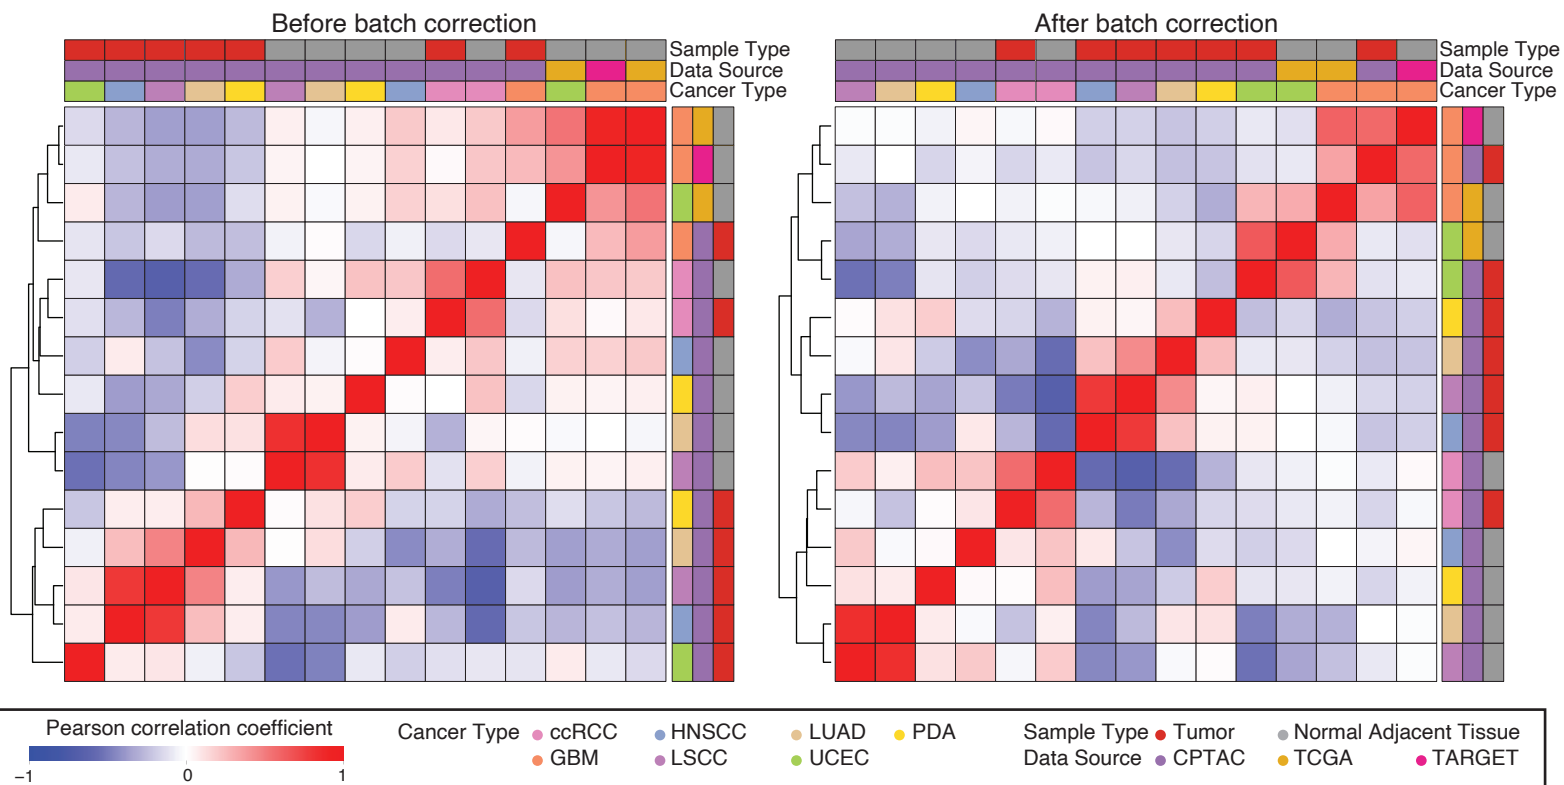

Figure S1

**Figure S1. Batch correction of DNA methylome across seven cancer types. Related to Figure 1.**

- (A) Heatmap of P-values of association between the top 20 singular vectors (principal components) from the SVD of the raw beta value matrix and phenotypic as well as experimental factors. Phenotypic factors included sample type (solid tumor and adjacent normal tissue). Experimental factors included sentrix position, sentrix ID, data source (TCGA and CPTAC), and batch number. The left panels present SVD analysis before any adjustment, and the right panels present the result of SVD analysis after adjustment for batch (ccRCC, LUAD, LSCC, and PDA) or source (GBM and UCEC) effects. No adjustment has been made for HNSCC. Box colors indicate significance of association based on P-values from ANOVA F-statistic:  $P < 10e-10$  (dark red),  $10e-10 < P < 10e-5$  (red),  $10e-5 < P < 0.01$  (orange),  $0.01 < P < 0.05$  (pink), not significant (white).
- (B) Heatmap showing the Pearson correlation coefficient between DNA methylation data obtained by hierarchical clustering using the Euclidean distance measure and the complete linkage method before (left) and after (right) ComBat batch correction.

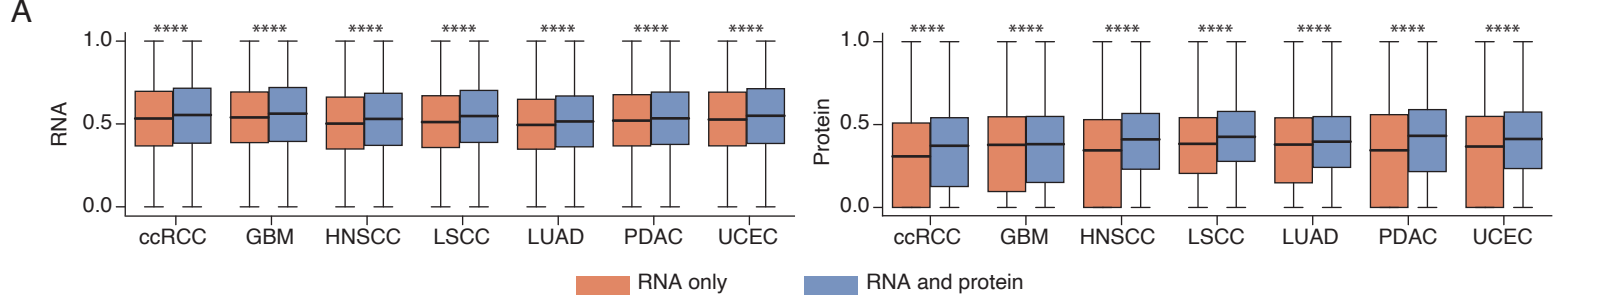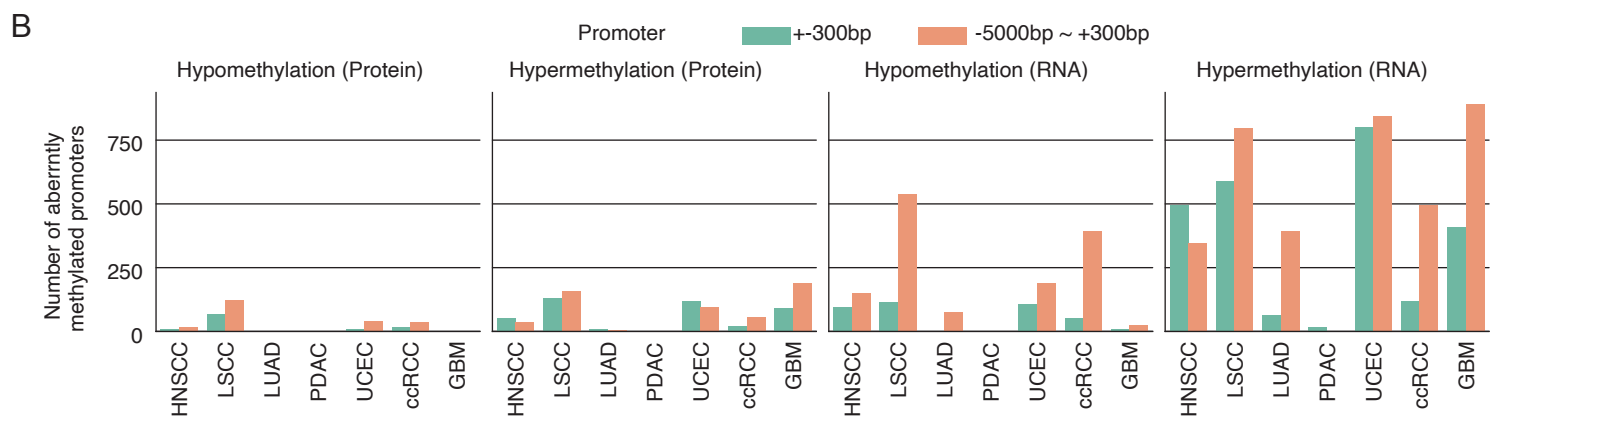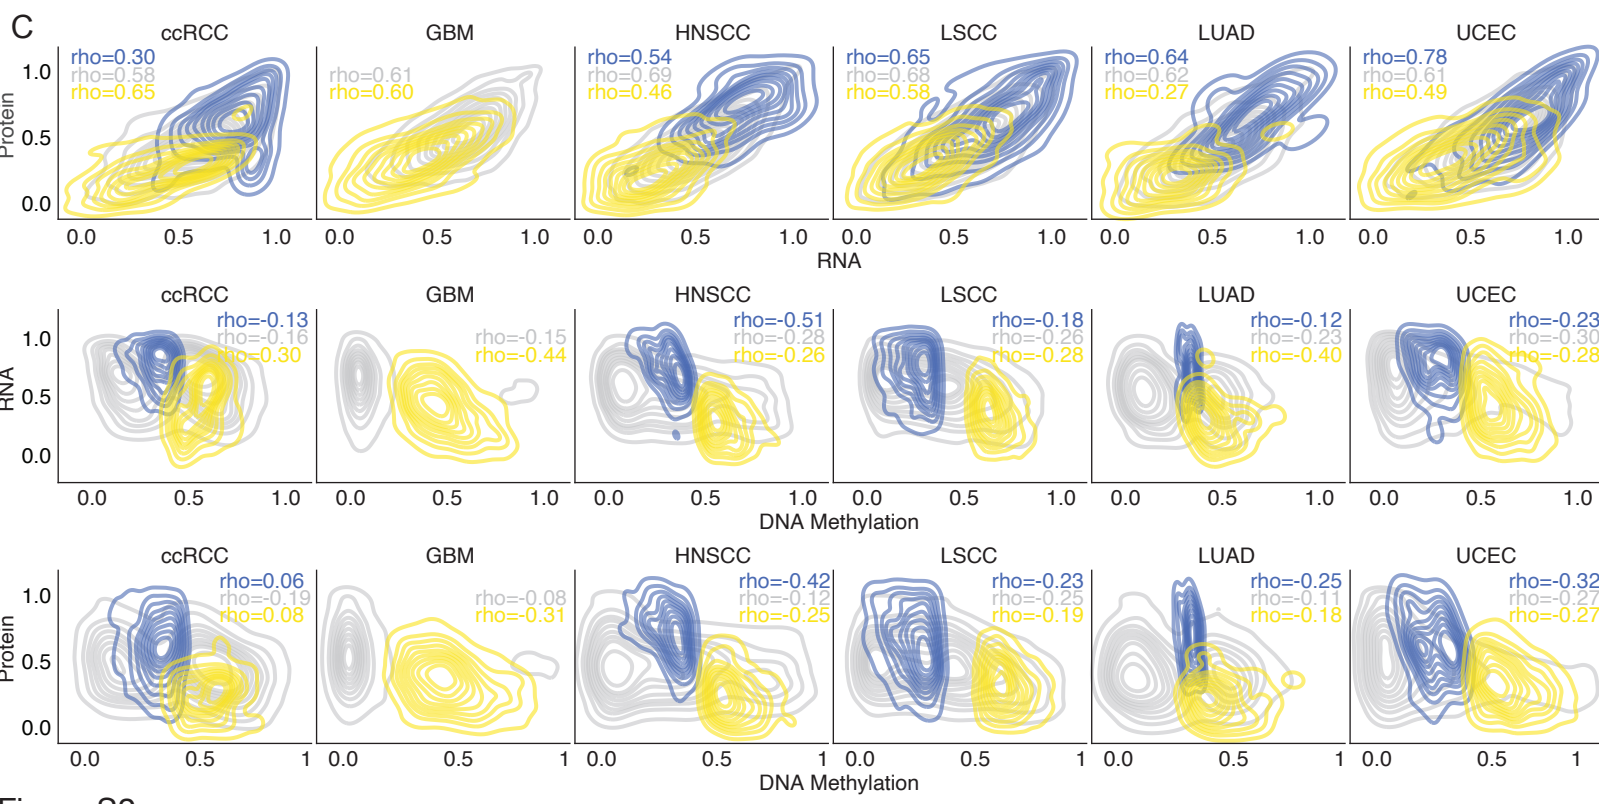

Figure S2

**Figure S2. Integrative analysis of DNA methylome, transcriptome, and proteome uncovers aberrant DNA methylation in tumors. Related to Figure 1 and 2.**

- (A) Box plots display the distribution of scaled RNA expression (left) and protein abundance values (right) for genes with promoter methylation correlated only with RNA expression (orange), compared to genes where promoter methylation correlates with both RNA and protein (blue). The median value is represented by the horizontal black line, while the first and third quartiles are indicated by the top and bottom lines, respectively. Statistical significance between groups was determined using a Wilcoxon rank sum test, with \*\*\*\* denoting  $P < 2.2e-16$ .
- (B) Number of gene promoters with aberrant DNA methylation observed in RESET pipeline runs with different definitions of promoter regions.
- (C) Correlation of RNA expression and protein abundance (first row), promoter methylation and RNA expression (second row), and promoter methylation and protein abundance (third row). The plot is based on the significant CpG sites in both RNA expression and protein abundance measurements, and colored based on methylation status: yellow, hypermethylation; blue, hypomethylation; gray: normal methylation. No significant correlation was found in the PDAC cohort.

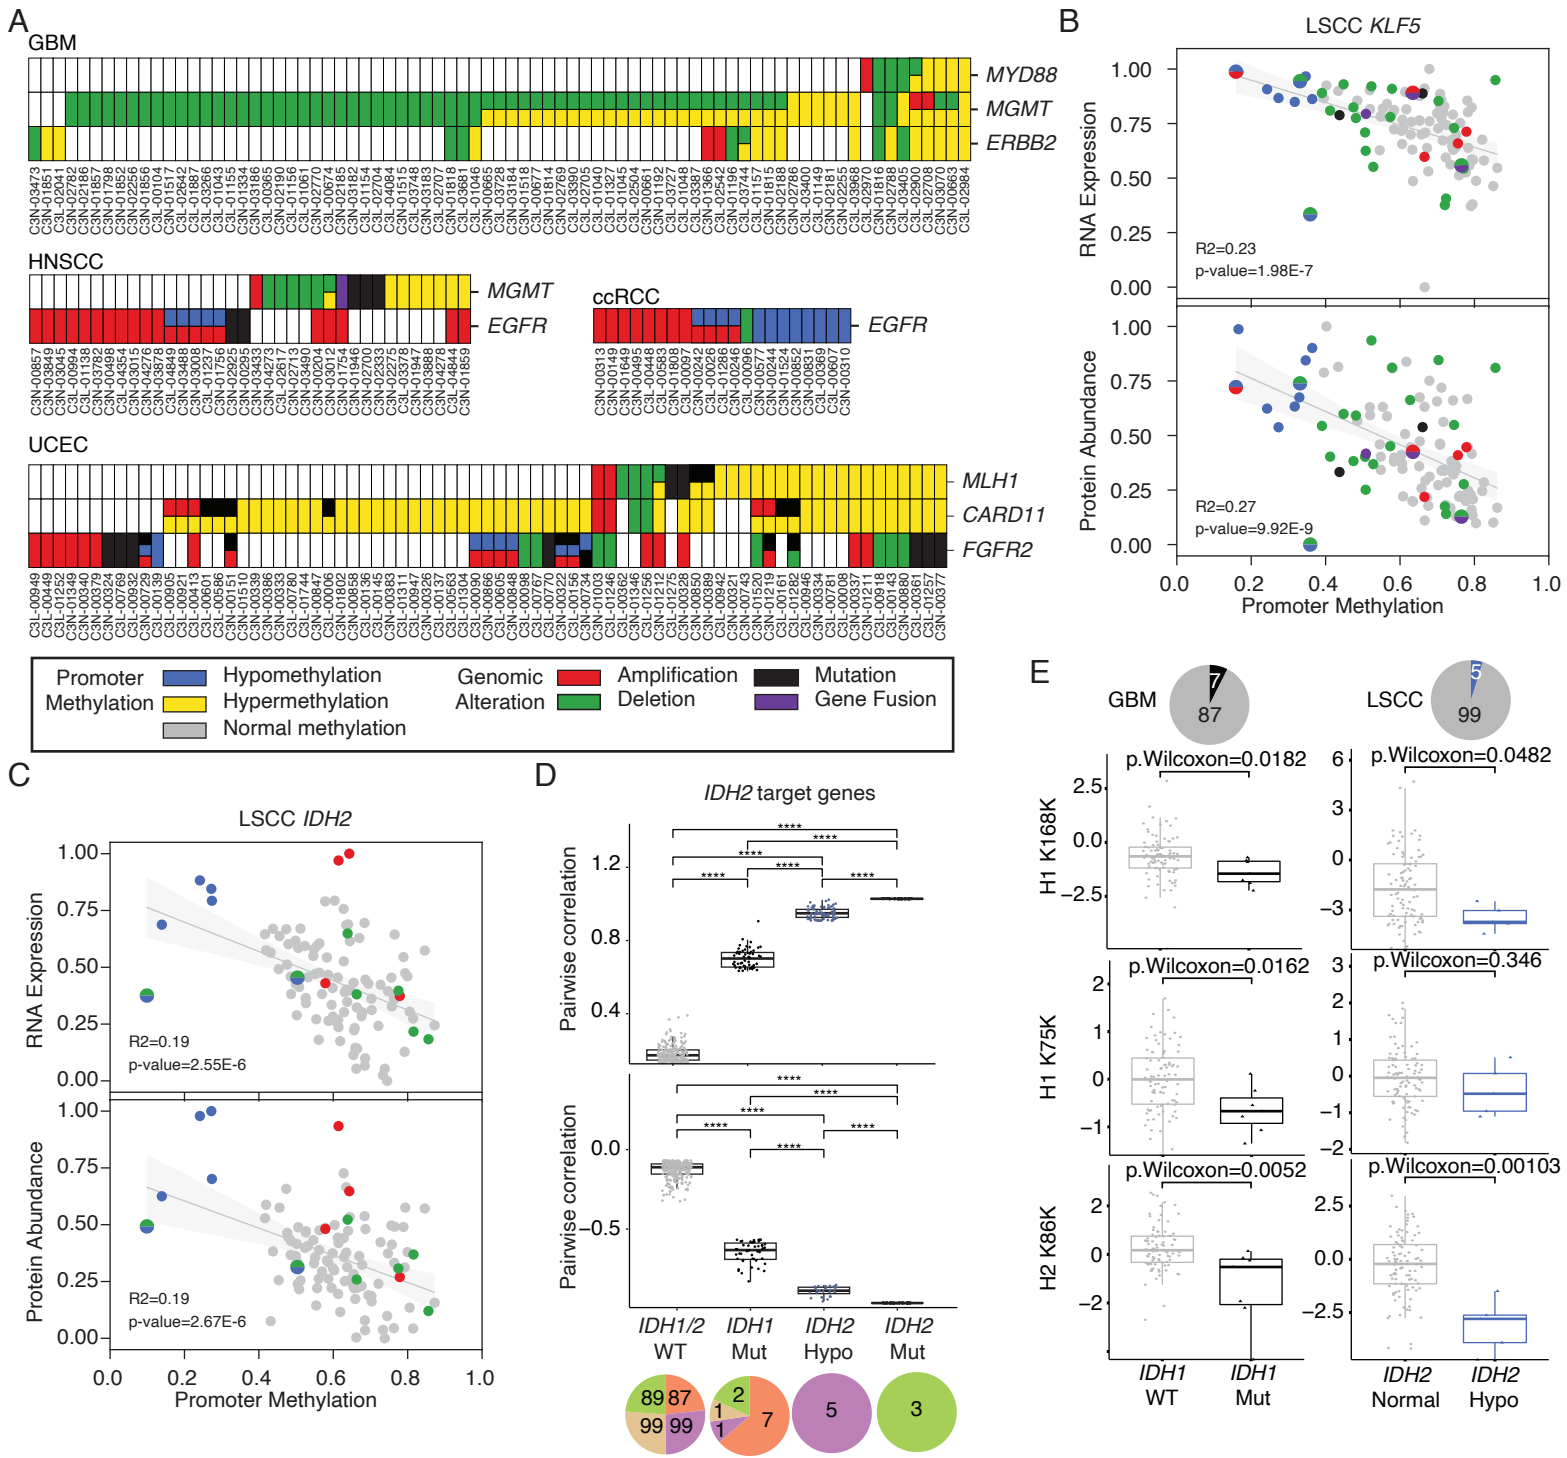

Figure S3

**Figure S3. Aberrant DNA methylation in the promoter of cancer-associated genes. Related to Figure 3.**

- (A) Mutual exclusivity and co-occurrence of genomic and epigenomic alterations in driver genes across cancer types. Each column represents a different tumor sample.
- (B) Correlation of promoter methylation at significant CpG sites with gene expression (upper) and protein abundance (lower) of *KLF5* in LSCC. Tumors harboring multiple alterations at *KLF5* are highlighted by large dot size.
- (C) Scatter plots demonstrating the correlations between promoter methylation and gene expression (upper) and protein abundance (lower) in *IDH2*. Each dot represents a LSCC tumor sample, and the color of the dots indicates the presence of genetic and/or epigenetic alterations of *IDH2*. Sample with multiple alterations are highlighted by large dot size.
- (D) Correlation coefficients of histone acetylation levels and methylation levels at *IDH2* target genes were examined among *IDH1/IDH2* wild-type, *IDH1* mutant, *IDH2* hypomethylated samples, and *IDH2* mutant. The breakdown of each group was shown in the pie chart below. The box plot illustrates positive and negative correlations separately, with the y-axis representing the significant Pearson correlation coefficients (Pearson's  $r > 0.2$ ,  $P < 0.05$ , or Pearson's  $r < -0.2$ ,  $P < 0.05$ ) of acetylation-methylation pairs. The x-axis represents the four groups categorized based on *IDH* alteration status. The boxes represent the interquartile range (IQR), with the horizontal line inside indicating the median correlation value. The whiskers extending from the boxes indicate the range of the data, excluding outliers, which are represented as individual data points beyond the whiskers. Statistically significant differences between groups were determined using FDR corrected P-values, with \*\*\*\* indicating  $P < 2.2e-16$ .
- (E) Box plots comparing acetylation levels of H1 K168K, H1 K75K, and H2 K86K are shown for *IDH1* mutants and wild-type samples in GBM (left) and *IDH2* normal methylated and hypomethylated samples in LSCC (right). The pie chart above provides the breakdown of each group. Boxes represent the interquartile range (IQR), with the median acetylation level indicated by the horizontal line inside. Whiskers extend from the boxes, representing the data range. Statistically significant differences between groups were assessed using the Wilcoxon rank-sum test.

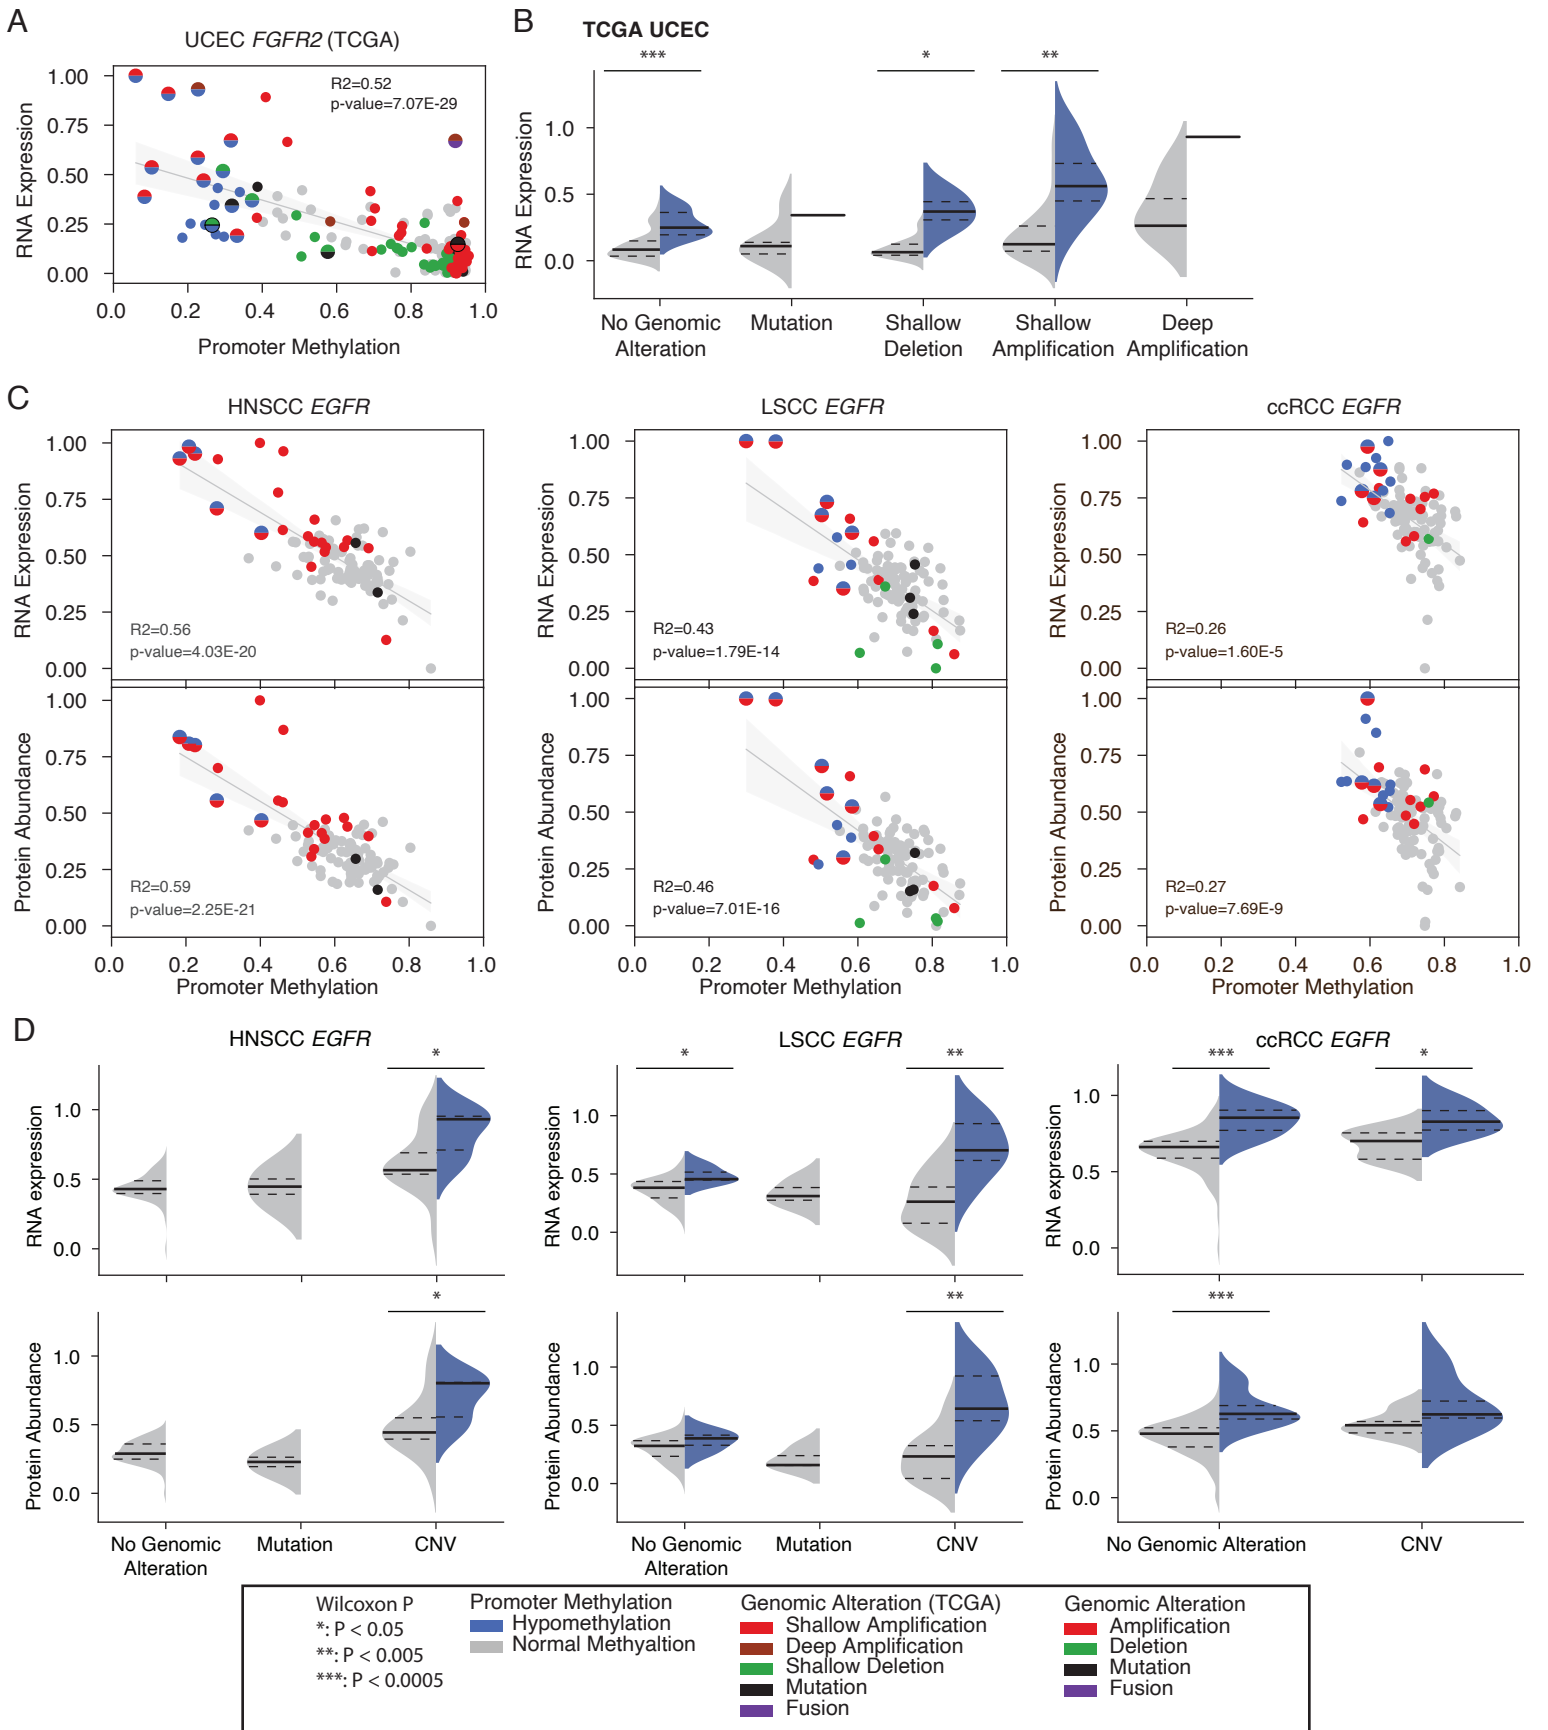

Figure S4

**Figure S4. Validation of *FGFR2* hypomethylation in TCGA UCEC cohort and hypomethylated *EGFR* is upregulated across cancer types. Related to Figure 4.**

- (A) Correlation of methylation at significant CpG site (cg10314760) with gene expression of *FGFR2* in TCGA UCEC cohort.
- (B) RNA expression level in TCGA UCEC tumors stratified by *FGFR2* genomic alterations and *FGFR2* hypomethylation (blue) versus *FGFR2* normal methylation (gray). The median value is shown as a solid black line, and the first and third quartiles are represented by the top and bottom dashed lines, respectively. Statistical significance was assessed using a Wilcoxon rank-sum test (\*  $P < 0.05$ , \*\*  $P < 0.005$ , \*\*\*  $P < 0.0005$ ).
- (C) Correlation of methylation at significant CpG sites with gene expression (upper) and protein abundance (lower) of *EGFR* in HNSCC (left), LSCC (middle), and ccRCC (right).
- (D) RNA (upper) and protein (lower) levels comparison between *EGFR* hypomethylation (blue) and *EGFR* normal methylation (gray), stratified by *EGFR* genomic alterations in HNSCC (left), LSCC (middle), and ccRCC (right). Median values are represented by solid black lines, and first and third quartiles are indicated by dashed lines. Statistical significance was determined using a Wilcoxon rank-sum test (\*  $P < 0.05$ , \*\*  $P < 0.005$ , \*\*\*  $P < 0.0005$ ).



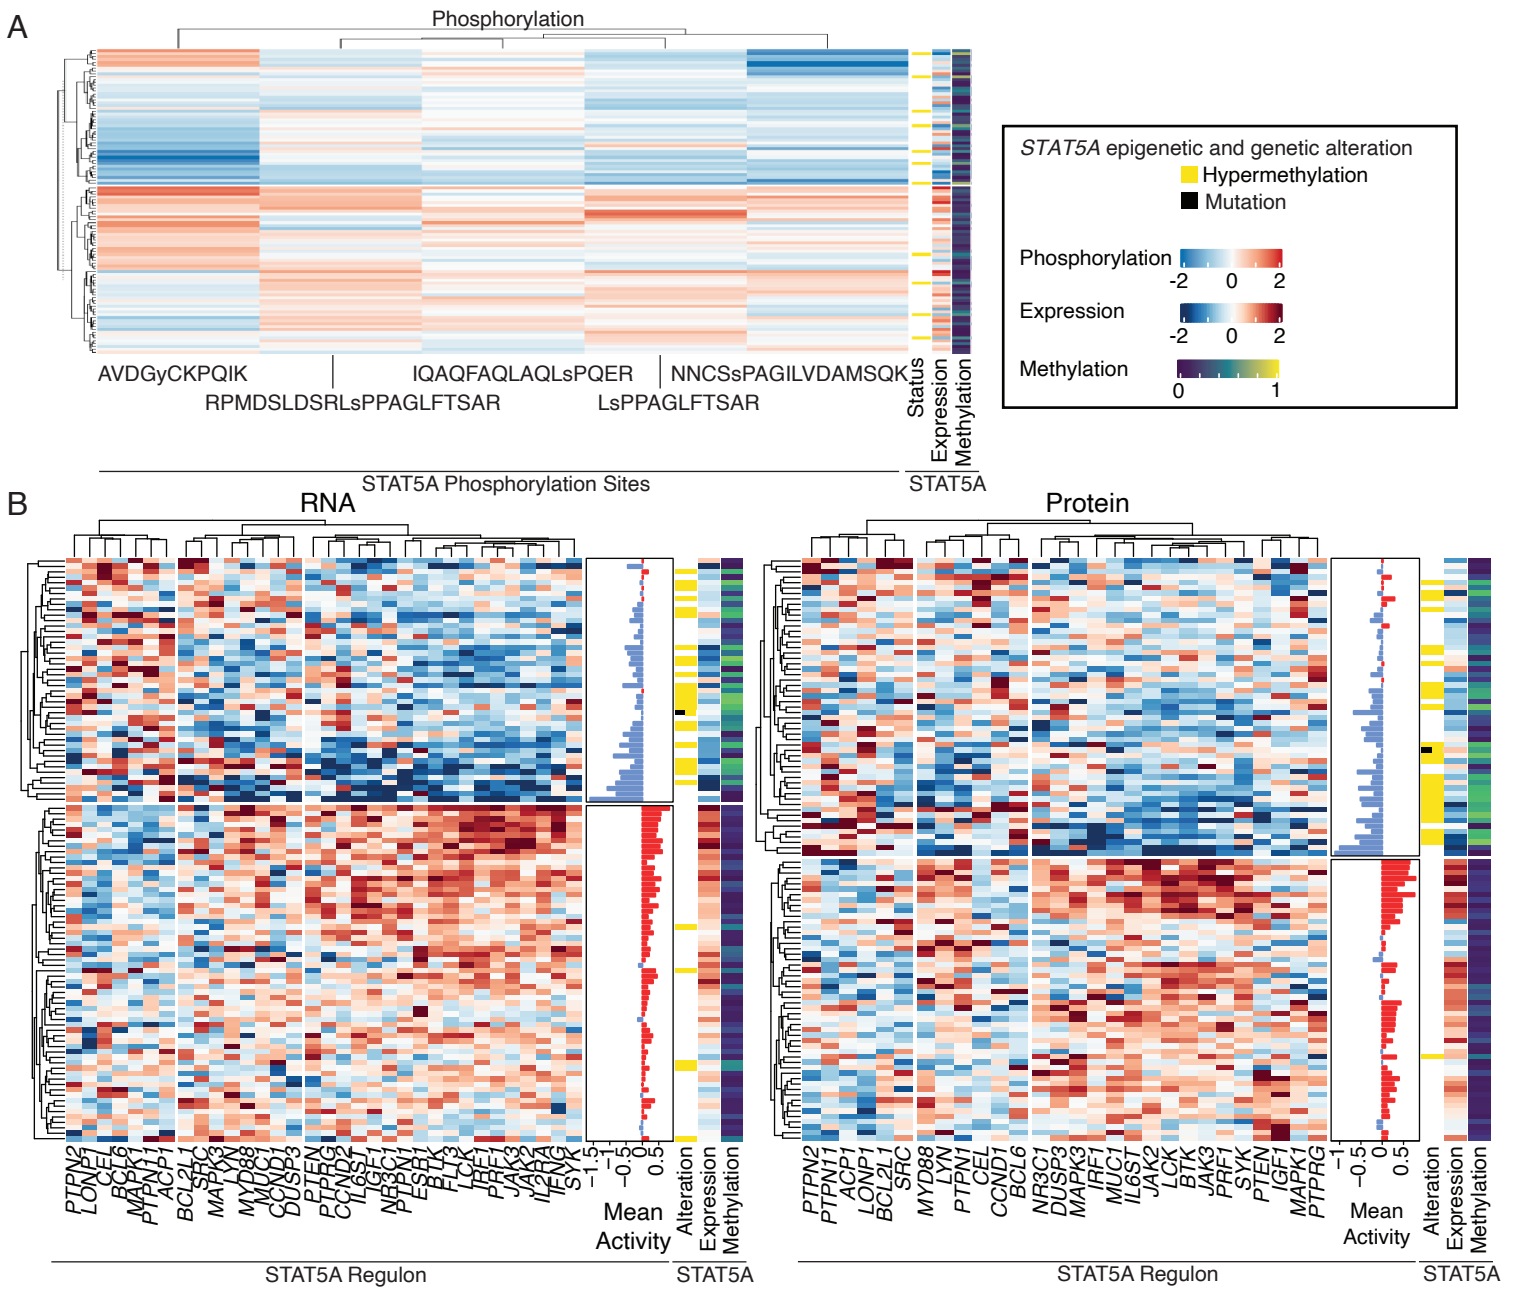

Figure S5

**Figure S5. Hypermethylated *STAT5A* and regulon activity. Related to Figure 5.**

- (A) Unsupervised clustering of *STAT5A* phosphorylation site using Pearson correlation of scaled RNA sequencing data. Annotations denote *STAT5A* expression and methylation levels. Color scale is proportional to phosphorylation activity (red: phosphorylated; blue: unphosphorylated).
- (B) Unsupervised clustering of *STAT5A* regulon genes using Pearson correlation of scaled RNA sequencing data in LSCC. Annotations denote *STAT5A* expression and methylation levels. Mean activity indicates the overall sum of regulon activity. The color scale is proportional to expression activity (red: upregulation; blue: downregulation).

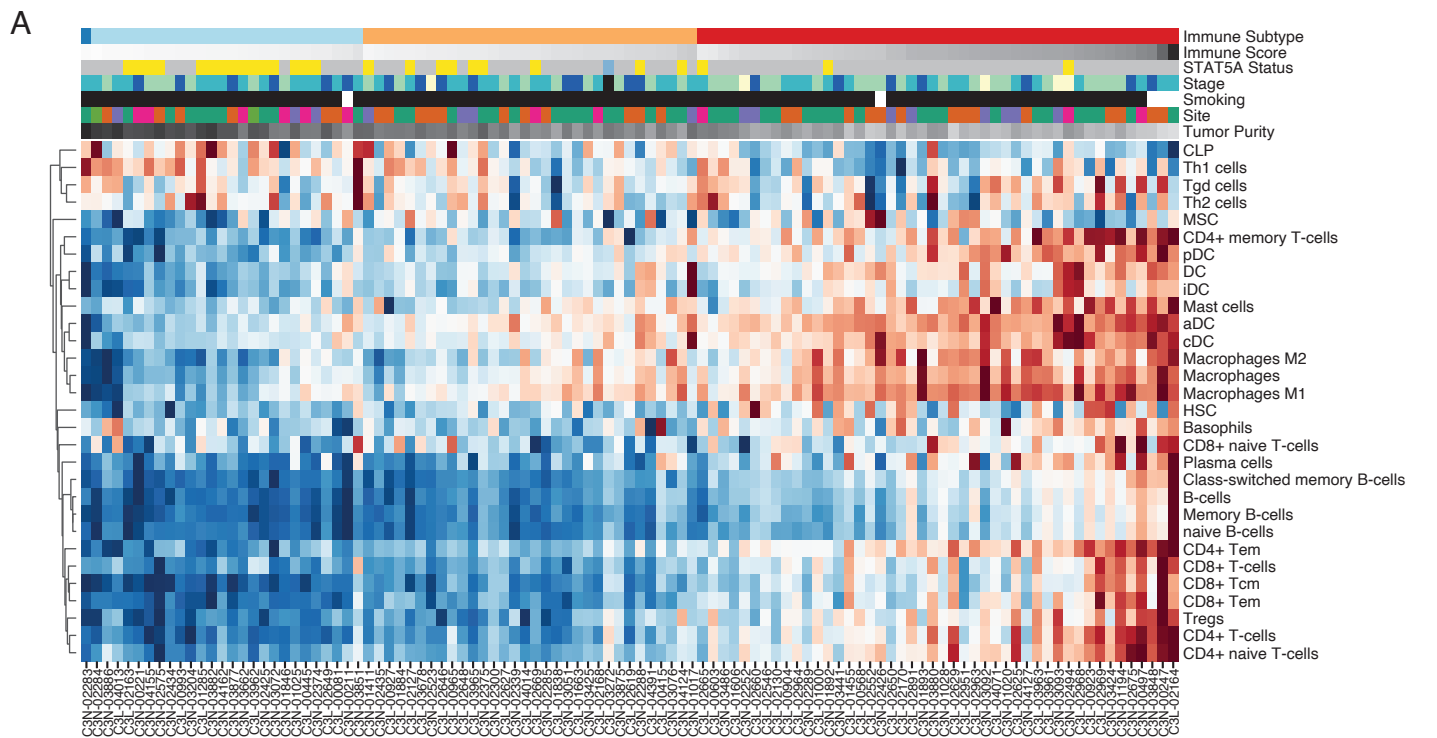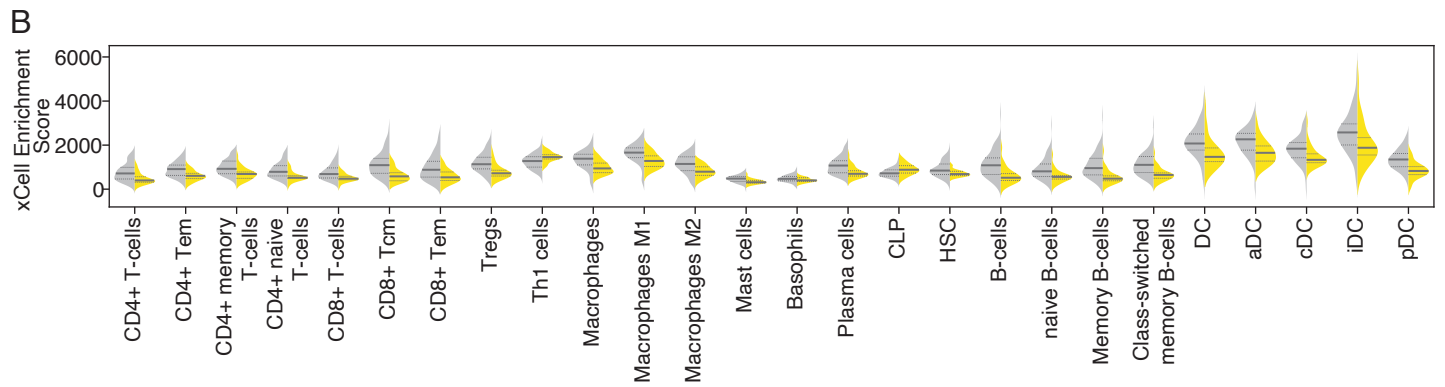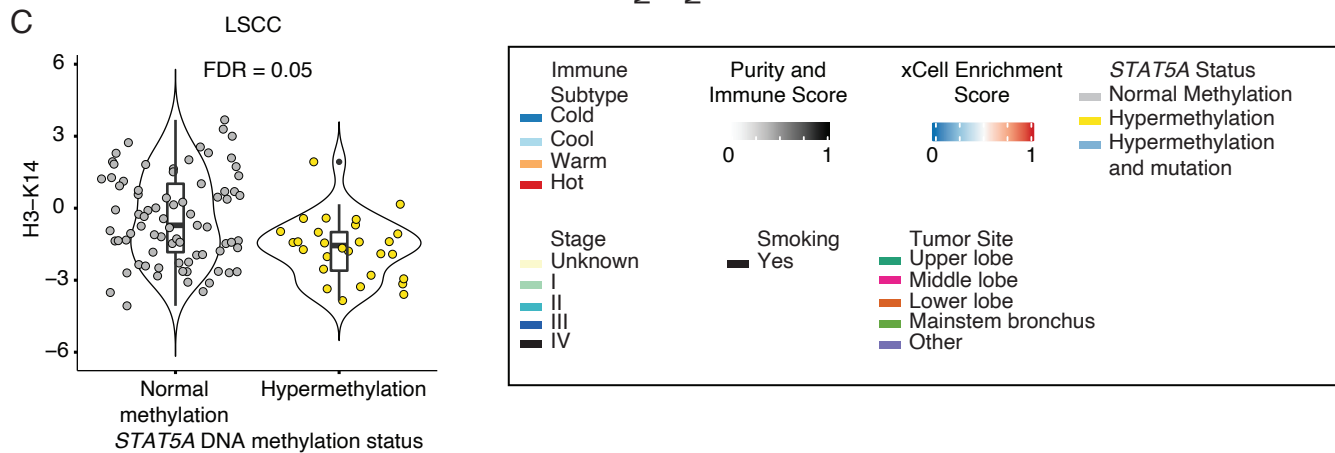

Figure S6

**Figure S6. Functional impact of *STAT5A* hypermethylation on immune cell depletion in LSCC. Related to Figure 6.**

- (A) Distinct immune subtypes of LSCC tumors identified by consensus clustering of LSCC tumors using xCell enrichment scores. The top panel shows the immune score, DNA methylation status of *STAT5A*, immune subtype, and tumor stage. The heatmap shows xCell enrichment scores deconvoluted from RNA-seq data.
- (B) Violin plots comparing xCell enrichment scores of immune effectors of *STAT5A* hypermethylation (yellow) versus of *STAT5A* normal methylation (gray) in LSCC tumors. Median values are shown as solid black lines, and first and third quartiles are represented by dashed lines. Statistical significance was determined using a Wilcoxon rank-sum test.
- (C) Violin plot comparing acetylation levels of H3 K14 between *STAT5A* hypermethylated samples (yellow) and normal methylated samples (gray) in LSCC. Boxes represent the IQR, with the median acetylation level shown as a horizontal line. Whiskers extend from the boxes to indicate the data range. Statistically significant differences between groups were determined using FDR-corrected P-values.

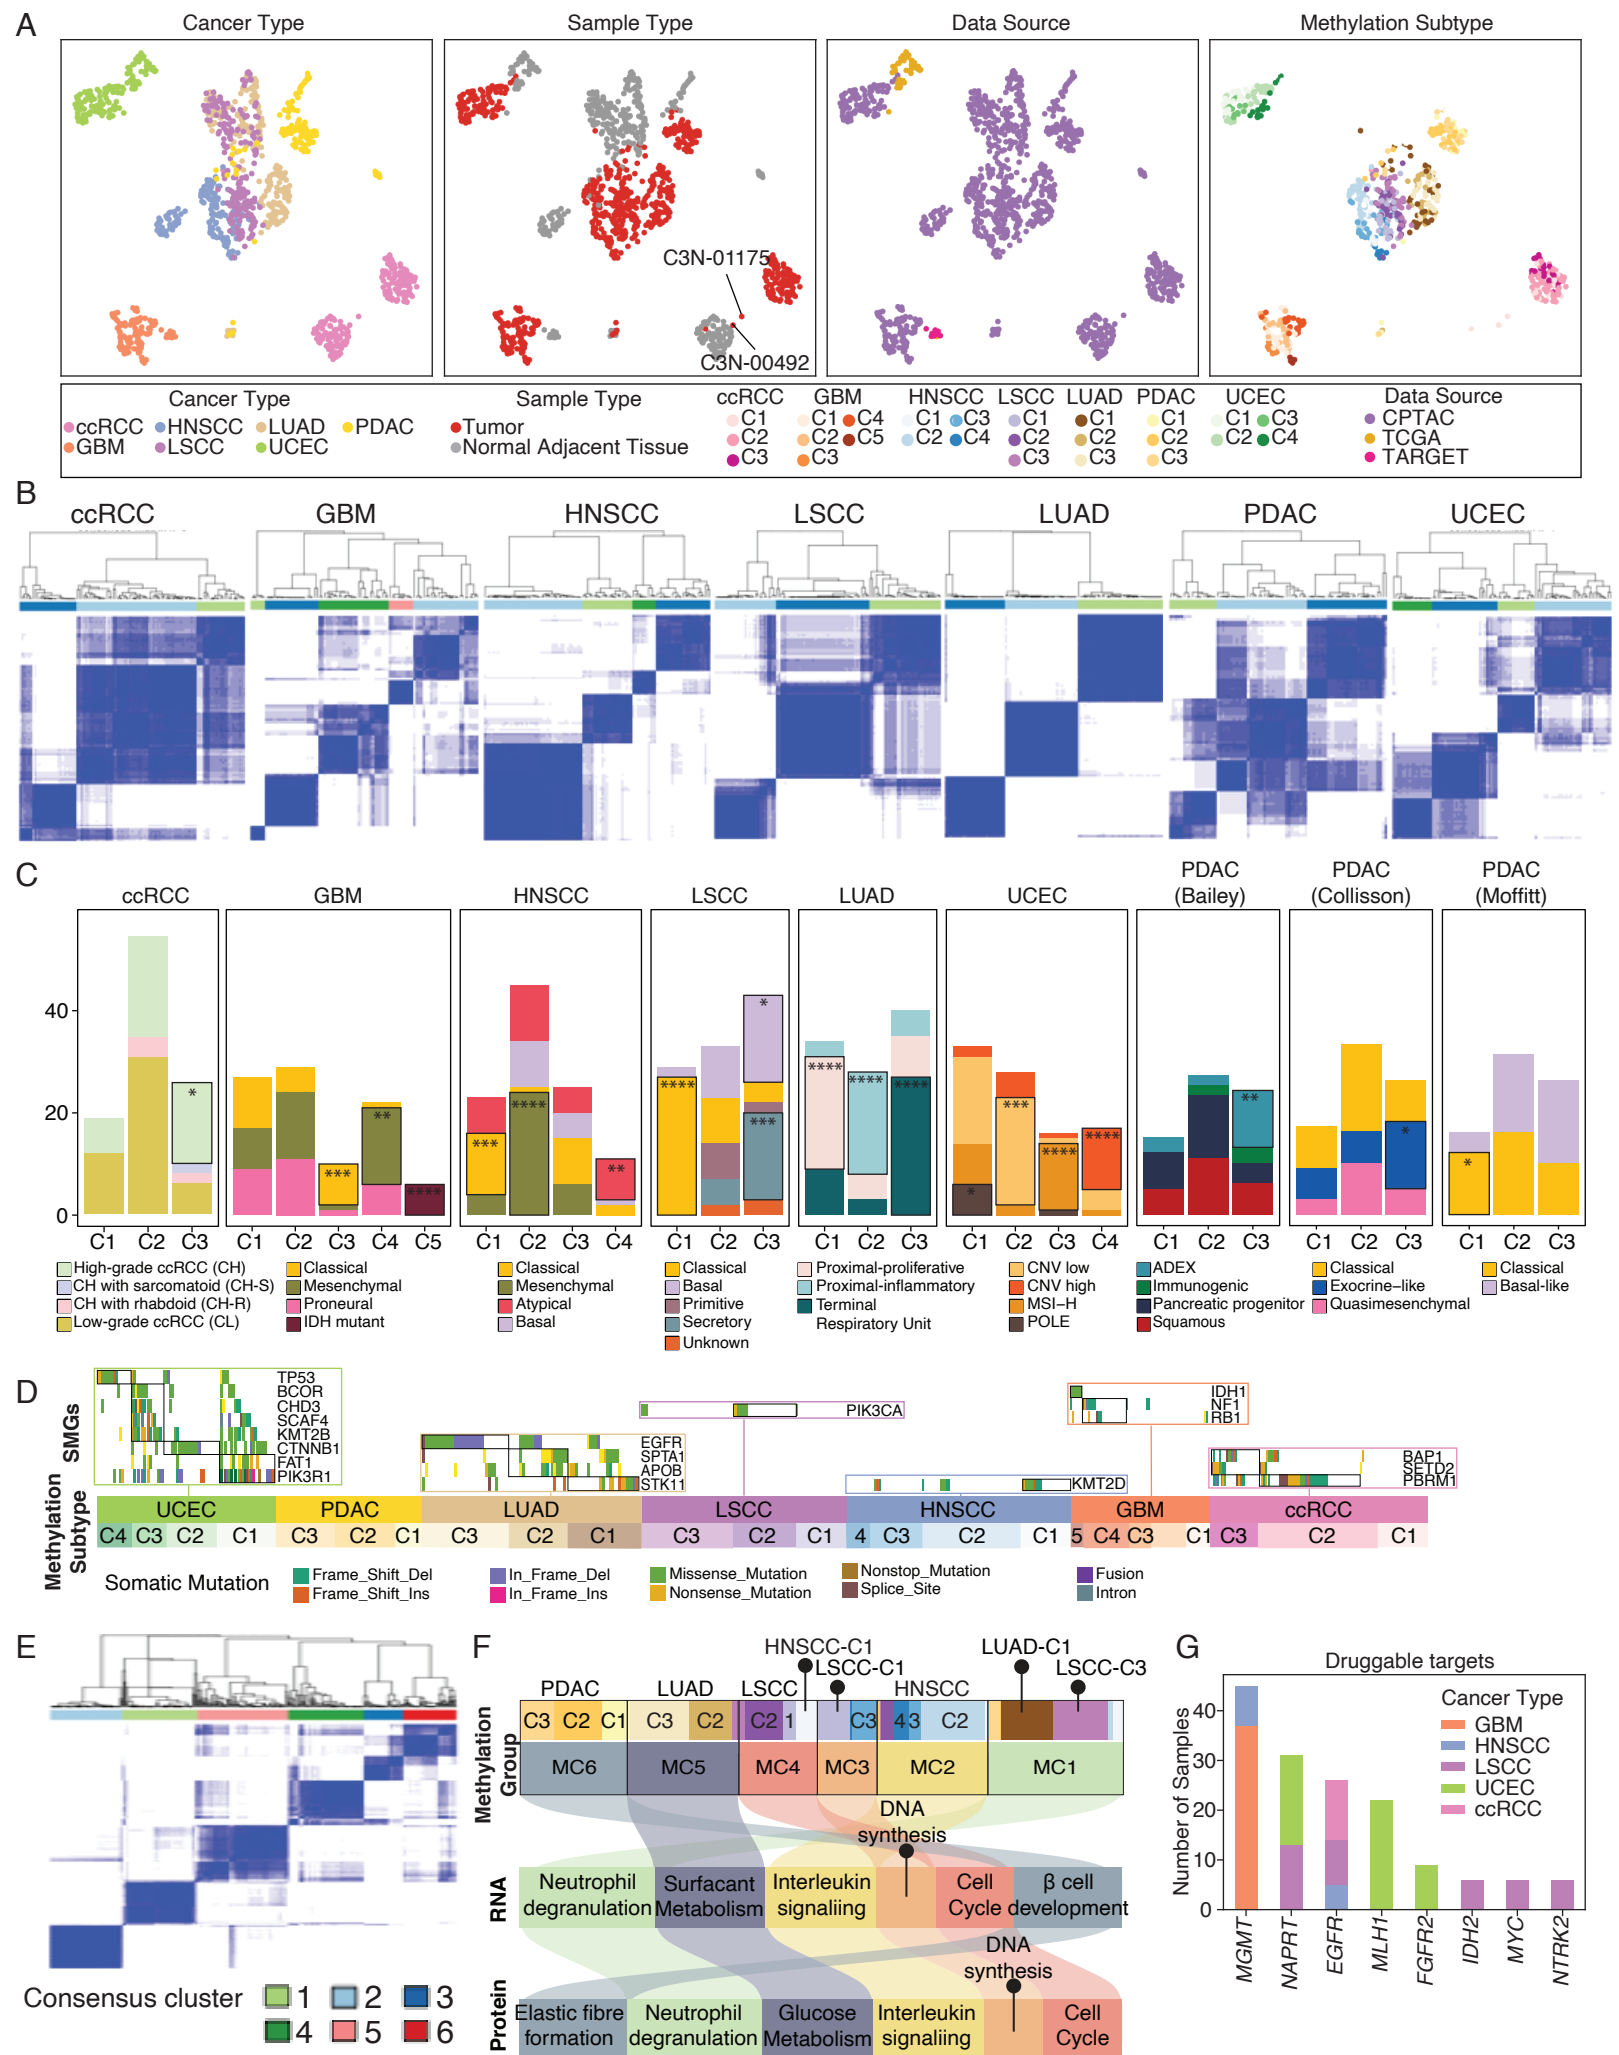

**Figure S7. Cancer methylome and methylation-driven subtyping. Related to Figure 7.**

- (A) Projection of the cancer methylomes using UMAP. Each point is a sample and is colored based on the cancer type (first column), sample type (second column), data source (third column), or methylation subtypes (fourth column). The two chromophobe RCC were highlighted.
- (B) Consensus matrix heatmap of the chosen optimal cluster number for all the per-cancer methylation-driven subtyping. The rows and columns represent DNA methylation values of tumor samples, and consensus matrix values range from 0 in white (meaning that tumors are never clustered together) to 1 in dark blue (meaning that tumors are always clustered together).
- (C) Bar plot showing the enrichment of molecularly and clinically relevant subtypes in methylation-driven subtypes across cancer types. Fisher's exact test \* < 0.05, \*\* < 0.005, \*\*\* < 0.0005, \*\*\*\* < 0.0001.
- (D) Oncoplot showing the enrichment of mutations at driver genes across methylation-driven subtypes.
- (E) Consensus matrix heatmap of the chosen optimal cluster number for the multi-cancer methylation groups. The rows and columns represent DNA methylation values of tumor samples, and consensus matrix values range from 0 in white (meaning that tumors are never clustered together) to 1 in dark blue (meaning that tumors are always clustered together).
- (F) Alluvial plot showing the multi-cancer methylation groups (first row), their enriched RNA expression signature (second row) and enriched protein signature (third row). The curved lines across panels correspond to different methylation groups.
- (G) Breakdown of potentially druggable genes, for which expression is altered by tumorigenic DNA methylation.
